# Supplementary material
Source: publisher site journal article supplement (https://www.spandidos-publications.com/2559/downloadSupplementary)

Figure S1. Representative images of tumor-bearing mice and tumors. (A) Mouse of the control group. (B) Mouse of the tumor-bearing group. (C and D) Representative tumors in the tumor-bearing group.

Tumor

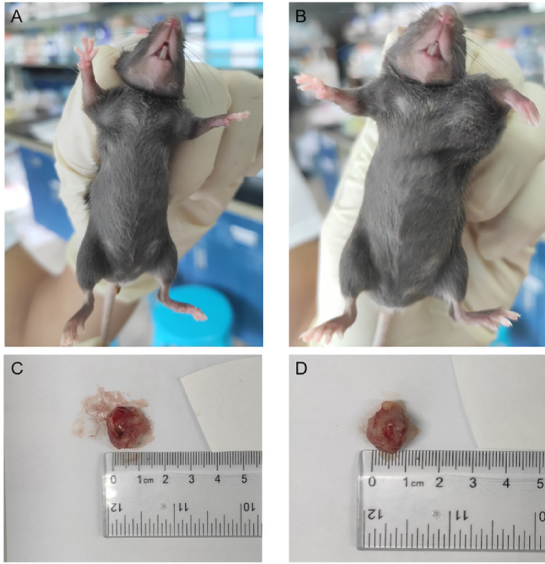

Supplement: Supplementary file 1 [file downloadSupplementary]
